# Supplementary material for: DPDS–DPS in situ transformation at room temperature via a 1,2-nucleophilic addition mechanism
Source: Royal Society of Chemistry journal article supplement (doi:10.1039/c4ce00781f), 2014-01-01
Supplement: c4ce00781f1.pdf [file c4ce00781f1.pdf]

Electronic Supplementary Information (ESI) available: [Relevant crystallographic data, TG and IR characterization]. See DOI:

**DPDS-DPS *in situ* Transformation at Room Temperature via a 1,2-Nucleophilic Addition Mechanism**

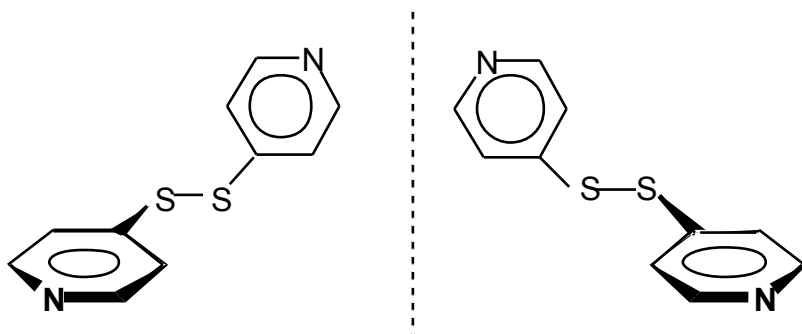

Fig. S1. Optical isomers of DPDS.

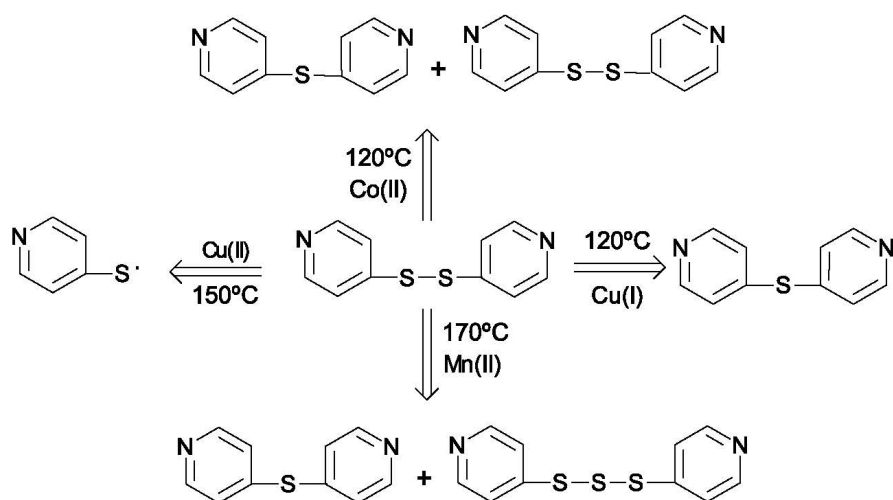

Scheme S1. Some different transformations of DPDS ligand.

**Table S1.** Crystal data and structure refinement for compound Mn(NCS)<sub>2</sub>(DPS)<sub>4</sub> (**1**)

|                                    |                                                                  |                      |
|------------------------------------|------------------------------------------------------------------|----------------------|
| Empirical formula                  | C <sub>42</sub> H <sub>32</sub> MnN <sub>10</sub> S <sub>6</sub> |                      |
| Formula weight                     | 924.08                                                           |                      |
| Temperature                        | 293(2) K                                                         |                      |
| Wavelength                         | 0.71073 Å                                                        |                      |
| Crystal system                     | Triclinic                                                        |                      |
| Space group                        | P $\bar{1}$                                                      |                      |
| Unit Cell Dimensions               | a = 9.694(3) Å                                                   | $\alpha$ = 87.71(4)° |
|                                    | b = 11.143(4) Å                                                  | $\beta$ = 76.90(3)°  |
|                                    | c = 11.326(3) Å                                                  | $\gamma$ = 67.65(4)° |
| Volume                             | 1100.5(6) eÅ <sup>3</sup>                                        |                      |
| Z                                  | 1                                                                |                      |
| Density (calculated)               | 1.394 Mg/m <sup>3</sup>                                          |                      |
| $\mu$                              | 0.628 mm <sup>-1</sup>                                           |                      |
| F(000)                             | 475                                                              |                      |
| $\theta$ range for data collection | 1.98° to 26.08°                                                  |                      |
| Index ranges                       | -11 ≤ h ≤ 11, -13 ≤ k ≤ 13, -13 ≤ l ≤ 13                         |                      |
| Collected reflections              | 8602                                                             |                      |
| Independent reflections            | 4003 [R(int) = 0.0608]                                           |                      |
| Refinement method                  | Full-matrix on F <sup>2</sup>                                    |                      |
| Data / restraints / parameters     | 4003 / 0 / 277                                                   |                      |
| Goodness-of-fit on F <sup>2</sup>  | 0.787                                                            |                      |
| R indices                          | R <sub>1</sub> = 0.0394, wR <sub>2</sub> (all data) = 0.0940     |                      |
| Largest $\Delta\rho$ peak and hole | 0.548 and -0.435 eÅ <sup>-3</sup>                                |                      |

**Table S2.** Most important intermolecular H-Bonds (units in Å and °) for compound Mn(NCS)<sub>2</sub>(DPS)<sub>4</sub> (**1**). Symmetry codes: i) 2-x, 1-y, -z. ii) 2-x, -y, -z. iii) -1+x, y, z.

|          |                                |                                |                                    |
|----------|--------------------------------|--------------------------------|------------------------------------|
| C6-H6    | H6 $\cdots$ S1 <sup>i</sup>    | C6 $\cdots$ S1 <sup>i</sup>    | C6-H6 $\cdots$ S1 <sup>i</sup>     |
| 0.930(5) | 3.083(2)                       | 3.687(5)                       | 124.3(2)                           |
| C5-H5    | H5 $\cdots$ S1 <sup>i</sup>    | C5 $\cdots$ S1 <sup>i</sup>    | C5-H5 $\cdots$ S1 <sup>i</sup>     |
| 0.929(4) | 3.012(2)                       | 3.640(5)                       | 126.3(3)                           |
| C18-H18  | H18 $\cdots$ S2 <sup>ii</sup>  | C18 $\cdots$ S2 <sup>ii</sup>  | C18-H18 $\cdots$ S2 <sup>ii</sup>  |
| 0.929(5) | 3.11(1)                        | 4.01(1)                        | 162.0(3)                           |
| C15-H15  | H15 $\cdots$ N5 <sup>i</sup>   | C15 $\cdots$ N5 <sup>i</sup>   | C15-H15 $\cdots$ N5 <sup>i</sup>   |
| 0.930(5) | 2.895(5)                       | 3.708(7)                       | 146.7(3)                           |
| C2-H2    | H2 $\cdots$ N3 <sup>iii</sup>  | C2 $\cdots$ N3 <sup>iii</sup>  | C2-H2 $\cdots$ N3 <sup>iii</sup>   |
| 0.930(4) | 2.875(7)                       | 3.473(8)                       | 123.2(3)                           |
| C3-H3    | H3 $\cdots$ N3 <sup>iii</sup>  | C3 $\cdots$ N3 <sup>iii</sup>  | C3-H3 $\cdots$ N3 <sup>iii</sup>   |
| 0.931(5) | 2.712(6)                       | 3.379(8)                       | 129.3(3)                           |
| C13-H13  | H13 $\cdots$ N5 <sup>iii</sup> | C13 $\cdots$ N5 <sup>iii</sup> | C13-H13 $\cdots$ N5 <sup>iii</sup> |
| 0.930(4) | 3.044(4)                       | 3.753(6)                       | 134.3(2)                           |

**Table S3.** Crystal data and structure refinement for [Fe(NCS)<sub>2</sub>(DPS)<sub>2</sub>]-2H<sub>2</sub>O (**2**)

|                                   |                                                                                |                |
|-----------------------------------|--------------------------------------------------------------------------------|----------------|
| Empirical formula                 | C <sub>22</sub> H <sub>20</sub> FeN <sub>6</sub> O <sub>2</sub> S <sub>4</sub> |                |
| Formula weight                    | 584.53                                                                         |                |
| Temperature                       | 293(2) K                                                                       |                |
| Wavelength                        | 0.71069 Å                                                                      |                |
| Crystal system                    | Monoclinic                                                                     |                |
| Space group                       | C2/c                                                                           |                |
| Unit cell dimensions              | a = 17.001(6) Å                                                                | α = 89.99(4)°  |
|                                   | b = 10.288(4) Å                                                                | β = 118.53(4)° |
|                                   | c = 16.629(6) Å                                                                | γ = 90.14(4)°  |
| Volume                            | 2555.3(16) Å <sup>3</sup>                                                      |                |
| Z                                 | 4                                                                              |                |
| Density (calculated)              | 1.519 Mg/m <sup>3</sup>                                                        |                |
| μ                                 | 0.950 mm <sup>-1</sup>                                                         |                |
| F(000)                            | 1200                                                                           |                |
| θ range for data collection       | 2.40° to 26.12°.                                                               |                |
| Index ranges                      | -20 ≤ h ≤ 20, -12 ≤ k ≤ 12, -20 ≤ l ≤ 20                                       |                |
| Reflections collected             | 9614                                                                           |                |
| Independent reflections           | 2490 [R(int) = 0.2777]                                                         |                |
| Refinement method                 | Full-matrix on F <sup>2</sup>                                                  |                |
| Data / restraints / parameters    | 2490 / 3 / 174                                                                 |                |
| Goodness-of-fit on F <sup>2</sup> | 0.625                                                                          |                |
| R indices                         | R <sub>1</sub> = 0.0446, wR <sub>2</sub> (all data) = 0.1051                   |                |
| Largest Δρ peak and hole          | 0.298 and -0.621 eÅ <sup>-3</sup>                                              |                |

**Table S4.** Most important intermolecular H-Bonds (units in Å and °) for compound [Fe(NCS)<sub>2</sub>(DPS)<sub>2</sub>]-2H<sub>2</sub>O (**2**). Symmetry codes: i) 1/2-x, 1/2+y, 3/2-z. ii) 1/2+x, 3/2-y, 1/2+z. iii) -1+x, y, z.

|           |                         |                         |                             |
|-----------|-------------------------|-------------------------|-----------------------------|
| O1-H1O1   | H1O1...S3 <sup>ii</sup> | O1...S3 <sup>ii</sup>   | O1-H1O1...S3 <sup>ii</sup>  |
| 0.850(10) | 2.7(8)                  | 3.26(7)                 | 130(9)                      |
| O1-H2O1   | H2O1...S3               | O1...S3                 | O1-H2O1...S3                |
| 0.850(5)  | 1.9(7)                  | 2.52(4)                 | 132(7)                      |
| C12-H12   | H12...O1 <sup>iii</sup> | C12...O1 <sup>iii</sup> | C12-H12...O1 <sup>iii</sup> |
| 0.930(8)  | 2.68(4)                 | 3.21(5)                 | 117(1)                      |

**Table S5.** Crystal data and structure refinement for Zn(NCO)<sub>2</sub>(DPS) (**3**)

|                                   |                                                                  |            |
|-----------------------------------|------------------------------------------------------------------|------------|
| Empirical formula                 | C <sub>12</sub> H <sub>8</sub> N <sub>4</sub> O <sub>2</sub> SZn |            |
| Formula weight                    | 337.65                                                           |            |
| Temperature                       | 293(2) K                                                         |            |
| Wavelength                        | 0.71069 Å                                                        |            |
| Crystal system                    | Orthorhombic                                                     |            |
| Space group                       | <i>Pcab</i>                                                      |            |
| Unit cell dimensions              | a = 14.545(3) Å                                                  | α = 90.00° |
|                                   | b = 14.834(3) Å                                                  | β = 90.00° |
|                                   | c = 12.805(4) Å                                                  | γ = 90.00° |
| Volume                            | 2762.8(1) Å <sup>3</sup>                                         |            |
| Z                                 | 8                                                                |            |
| Density (calculated)              | 1.624 Mg/m <sup>3</sup>                                          |            |
| μ                                 | 1.934 mm <sup>-1</sup>                                           |            |
| F(000)                            | 1360                                                             |            |
| θ range for data collection       | 2.52° to 25.99°                                                  |            |
| Index ranges                      | -17 ≤ h ≤ 17, -18 ≤ k ≤ 18, 0 ≤ l ≤ 15                           |            |
| Reflections collected             | 9399                                                             |            |
| Independent reflections           | 2698                                                             |            |
| Refinement method                 | Full-matrix on F <sup>2</sup>                                    |            |
| Data / restraints / parameters    | 2698/ 0 / 182                                                    |            |
| Goodness-of-fit on F <sup>2</sup> | 0.801                                                            |            |
| R indices                         | R <sub>1</sub> = 0.0289, wR <sub>2</sub> (all data) = 0.0679     |            |
| Largest Δρ peak and hole          | 0.199 and -0.304 eÅ <sup>-3</sup>                                |            |

**Table S6.** Most important intermolecular H-Bonds (units in Å and °) for compound Zn(NCO)<sub>2</sub>(DPS) (**3**). Symmetry codes: i) 3/2-x, 1/2+y, -z. ii) 1/2+x, 1/2-y, z. iii) 3/2-x, 1/2+y, 1-z.

|          |                         |                         |                             |
|----------|-------------------------|-------------------------|-----------------------------|
| C11-H11  | H11...O1 <sup>i</sup>   | C11...O1 <sup>i</sup>   | C11-H11...O1 <sup>i</sup>   |
| 0.930(5) | 2.389(4)                | 3.187(7)                | 143.7(3)                    |
| C6-H6    | H6...O2 <sup>ii</sup>   | C6...O2 <sup>ii</sup>   | C6-H6...O2 <sup>ii</sup>    |
| 0.930(6) | 2.686(6)                | 3.582(8)                | 162.0(3)                    |
| C10-H10  | H10...O2 <sup>iii</sup> | C10...O2 <sup>iii</sup> | C10-H10...O2 <sup>iii</sup> |
| 0.930(6) | 2.630(4)                | 3.365(7)                | 136.4(3)                    |

**Table S7.** Crystal data and structure refinement for [Zn(DPS)<sub>4</sub>(H<sub>2</sub>O)<sub>2</sub>](ClO<sub>4</sub>)<sub>2</sub>·H<sub>2</sub>O (4)

|                                   |                                                                                                  |         |  |
|-----------------------------------|--------------------------------------------------------------------------------------------------|---------|--|
| Empirical formula                 | C <sub>40</sub> H <sub>38</sub> C <sub>12</sub> N <sub>8</sub> O <sub>11</sub> S <sub>4</sub> Zn |         |  |
| Formula weight                    | 1071.35                                                                                          |         |  |
| Temperature                       | 293(2) K                                                                                         |         |  |
| Wavelength                        | 0.71073 Å                                                                                        |         |  |
| Crystal system                    | Tetragonal                                                                                       |         |  |
| Space group                       | P4 <sub>1</sub> 2 <sub>1</sub> 2                                                                 |         |  |
| Unit cell dimensions              | a = 16.529(2) Å                                                                                  | α = 90° |  |
|                                   | b = 16.529(2) Å                                                                                  | β = 90° |  |
|                                   | c = 16.604(2) Å                                                                                  | γ = 90° |  |
| Volume                            | 4536.3(11) Å <sup>3</sup>                                                                        |         |  |
| Z                                 | 4                                                                                                |         |  |
| Density (calculated)              | 1.569 Mg/m <sup>3</sup>                                                                          |         |  |
| μ                                 | 0.912 mm <sup>-1</sup>                                                                           |         |  |
| F(000)                            | 2200                                                                                             |         |  |
| θ range for data collection       | 1.74° to 28.20°                                                                                  |         |  |
| Index ranges                      | -21 ≤ h ≤ 18, -21 ≤ k ≤ 11, -21 ≤ l ≤ 20                                                         |         |  |
| Reflections collected             | 28832                                                                                            |         |  |
| Independent reflections           | 5315                                                                                             |         |  |
| Refinement method                 | Full-matrix on F <sup>2</sup>                                                                    |         |  |
| Data / restraints / parameters    | 5315 / 0 / 311                                                                                   |         |  |
| Goodness-of-fit on F <sup>2</sup> | 1.021                                                                                            |         |  |
| R indices                         | R <sub>1</sub> = 0.0511, wR <sub>2</sub> (all data) = 0.1195                                     |         |  |
| Largest Δρ peak and hole          | 1.030 and -0.372 eÅ <sup>-3</sup>                                                                |         |  |

**Table S8.** Most important intermolecular (units in Å and °) H-Bonds for compound [Zn(DPS)<sub>4</sub>(H<sub>2</sub>O)<sub>2</sub>](ClO<sub>4</sub>)<sub>2</sub>·H<sub>2</sub>O (4)

|          |         |          |             |
|----------|---------|----------|-------------|
| O5-H51   | H5⋯N3   | O5⋯N3    | O5-H51⋯N3   |
| 0.93(3)  | 1.92(3) | 2.852(4) | 176(3)      |
| O1W-H12W | H12W⋯O5 | O1W⋯O5   | O1W-H12W⋯O5 |
| 0.78(5)  | 2.02(5) | 2.781(3) | 165(4)      |
| O1W-H11W | H11W⋯N4 | O1W⋯N4   | O1W-H11W⋯N4 |
| 0.79(5)  | 2.03(5) | 2.813(4) | 170(5)      |

**Table S9.** Details of the coordination environment for compounds **1-4**.

|                              | (1)           | (2)           | (3)           | (4)           |
|------------------------------|---------------|---------------|---------------|---------------|
| Minimum distance             | N1 = 2.158(5) | N2 = 1.902(5) | N3 = 2.099(8) | N2 = 2.138(3) |
| Maximum distance             | N4 = 2.350(4) | N4 = 2.046(5) | N2 = 2.239(8) | N1 = 2.184(3) |
| $\ell_{av}$ (Å)              | 2.2636        | 1.9769        | 2.1887        | 2.1582        |
| Volume (Å <sup>3</sup> )     | 15.4291       | 3.9123        | 13.9122       | 13.3324       |
| $D$                          | 0.03120       | 0.03345       | 0.02745       | 0.00810       |
| $\langle \lambda \rangle$    | 1.0027        | 1.0101        | 1.0041        | 1.0037        |
| $\sigma^2$ (° <sup>2</sup> ) | 0.8913        | 45.3154       | 8.5863        | 12.9896       |

$\ell_{av}$  is the average bond length;  $D = \frac{1}{n} \sum_{i=1}^n \frac{|\ell_i - \ell_{av}|}{\ell_{av}}$  is the distortion index on bond lengths<sup>14</sup>, where  $\ell_i$  is the distance from the central atom to the  $i^{\text{th}}$  coordinating atom;  $\langle \lambda \rangle = \frac{1}{n} \sum_{i=1}^n \left( \frac{\ell_i}{\ell_o} \right)^2$  is the quadratic elongation<sup>15</sup> where  $\ell_o$  is the center to vertex distance of a regular polyhedron of the same volume;  $\sigma^2 = \frac{1}{m-1} \sum_{i=1}^m (\phi_i - \phi_o)^2$  is the bond angle variance<sup>15</sup>, where  $m$  is the number of bond angles,  $\phi_i$  the  $i^{\text{th}}$  bond angle and  $\phi_o$  the ideal bond angle for a regular polyhedron.

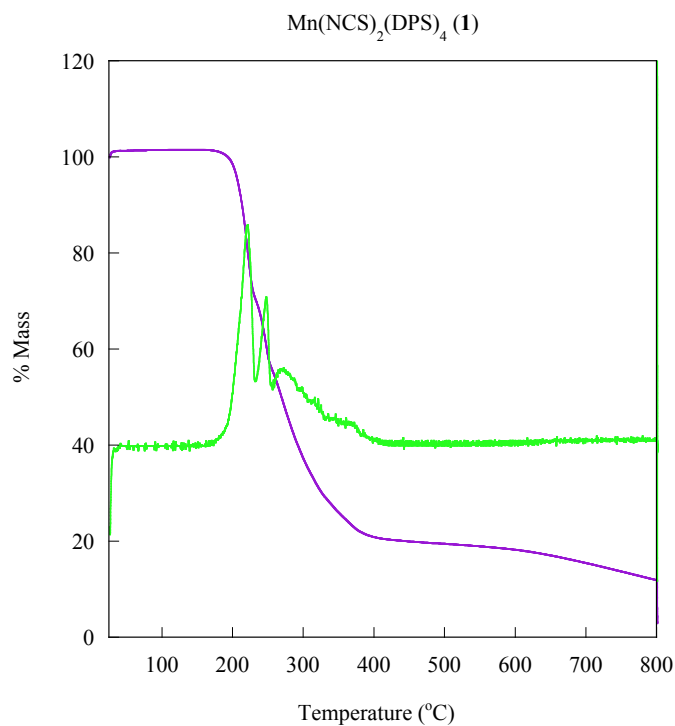

**Fig. S2.** Graphic of TG and DTG of compound  $\text{Mn}(\text{NCS})_2(\text{DPS})_4$  (1)

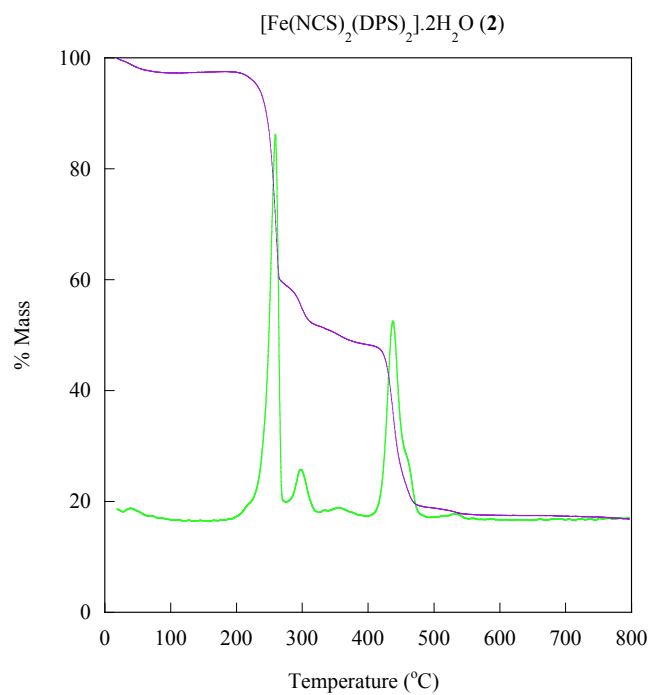

**Fig. S3.** Graphic of TG and DTG of compound  $[\text{Fe}(\text{NCS})_2(\text{DPS})_2] \cdot 2\text{H}_2\text{O}$  (2)

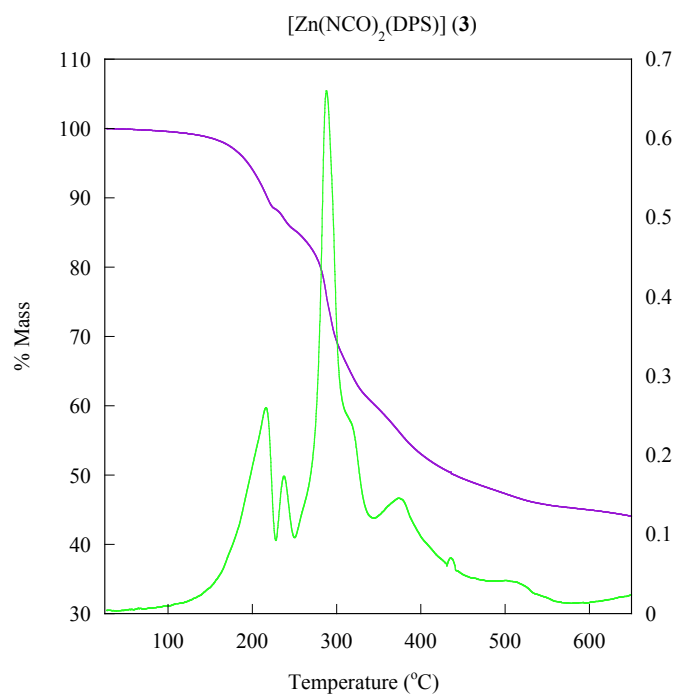

**Fig. S4.** Graphic of TG and DTG of compound  $[\text{Zn}(\text{NCO})_2(\text{DPS})] \text{ (3)}$

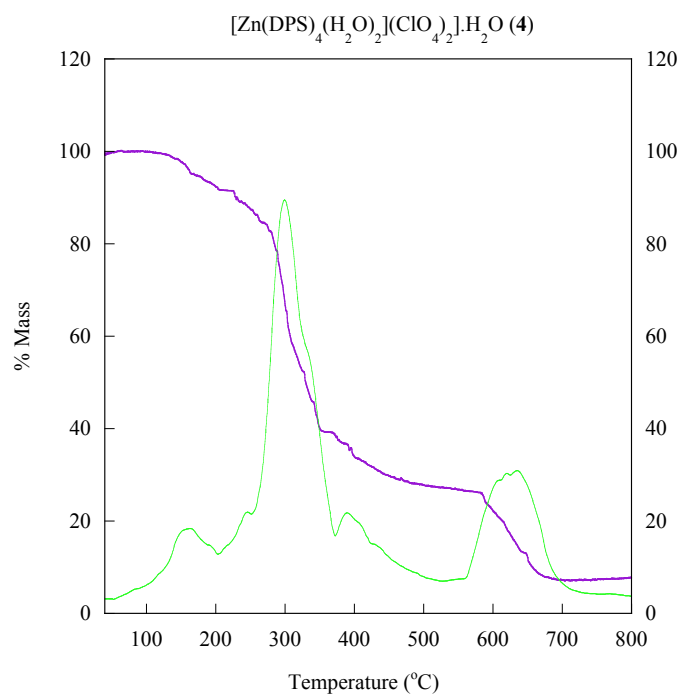

**Fig. S5.** Graphic of TG and DTG of compound  $[\text{Zn}(\text{DPS})_4(\text{H}_2\text{O})_2](\text{ClO}_4)_2 \cdot \text{H}_2\text{O} \text{ (4)}$



**Table S10.** Thermogravimetric analysis for compounds **1-4**. Notice that owing to the complex TG/DTG behaviour showed by compound **3** (see Fig. S4) the interpretation of the decomposition process is merely qualitative

| COMPOUND                                                                                                                | STEP  | T <sub>i</sub> (°C) | T <sub>f</sub> (°C) | %Δm<br>exper. | %Δm<br>theor. | Assignment<br>(per unit formula)     |
|-------------------------------------------------------------------------------------------------------------------------|-------|---------------------|---------------------|---------------|---------------|--------------------------------------|
| [Mn(DPS) <sub>4</sub> (NCS) <sub>2</sub> ]                                                                              | 1     | 193                 | 479                 | 80.2          | 81.48         | Loss of 4 DPS ligands                |
|                                                                                                                         | 2     | 479                 | 791                 | 12.27         | 12.56         | Decomposition of NCS group           |
|                                                                                                                         | TOTAL | 193                 | 791                 | 92.47         | 94.04         |                                      |
| [Fe(NCS) <sub>2</sub> (DPS) <sub>2</sub> ] <sub>2</sub> ·2H <sub>2</sub> O                                              | 1     | 40                  | 190                 | 4             | 6.15          | Loss of 2 molecules of water         |
|                                                                                                                         | 2     | 190                 | 421                 | 54.9          | 64.4          | Decomposition of DPS ligands         |
|                                                                                                                         | 3     | 421                 | 514                 | 24.2          | 19.9          | Pyrolysis of NCS groups              |
|                                                                                                                         | TOTAL | 40                  | 514                 | 83.1          | 90.45         |                                      |
| [Zn(NCO) <sub>2</sub> (DPS)]                                                                                            | 1     | 110                 | 278                 | 14.74         |               | Decomposition of DPS ligand          |
|                                                                                                                         | 2     | 278                 | 323                 | 24.12         |               |                                      |
|                                                                                                                         | 3     | 323                 | 572                 | 15.86         |               | Pyrolysis of NCO groups              |
|                                                                                                                         | TOTAL | 110                 | 572                 | 54.72         |               |                                      |
| [Zn(DPS) <sub>4</sub> (H <sub>2</sub> O) <sub>2</sub> (ClO <sub>4</sub> ) <sub>2</sub> ] <sub>2</sub> ·H <sub>2</sub> O | 1     | 67                  | 171                 | 5.23          | 5.04          | Loss of 3 molecules of water         |
|                                                                                                                         | 2     | 171                 | 570                 | 68.23         | 68.04         | Decomposition of 4 DPS ligands       |
|                                                                                                                         | 3     | 570                 | 700                 | 19.11         | 18.56         | Pyrolysis of ClO <sub>4</sub> groups |
|                                                                                                                         | TOTAL | 67                  | 700                 | 92.57         | 91.64         |                                      |

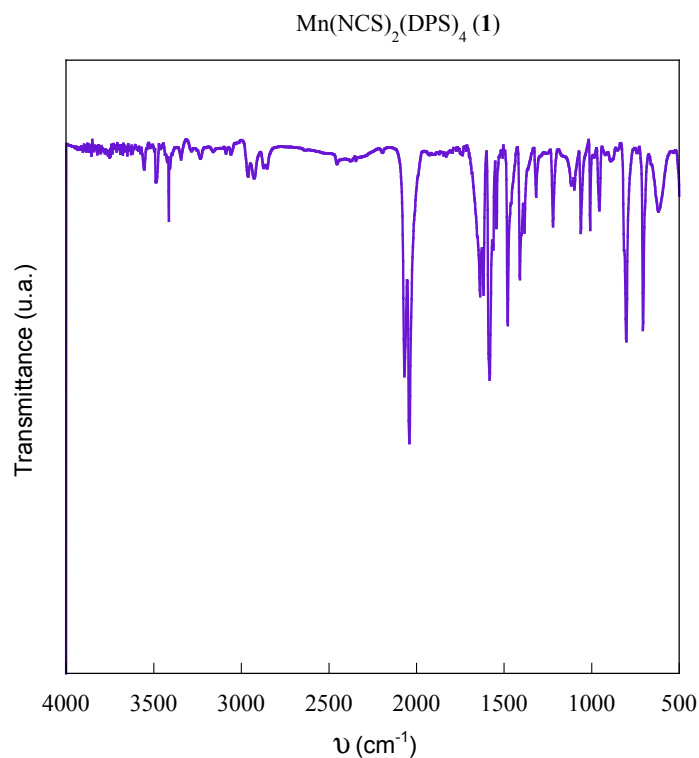

**Fig. S6.** IR spectra of  $\text{Mn}(\text{NCS})_2(\text{DPS})_4$  (**1**).

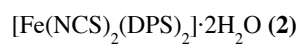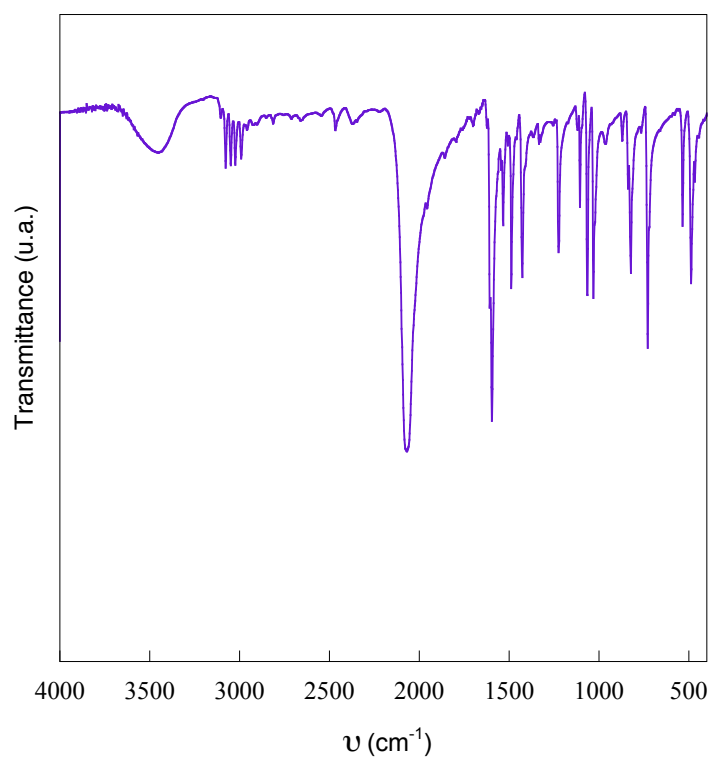

**Fig. S7.** IR spectra of  $[\text{Fe}(\text{NCS})_2(\text{DPS})_2] \cdot 2\text{H}_2\text{O}$  (**2**)

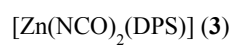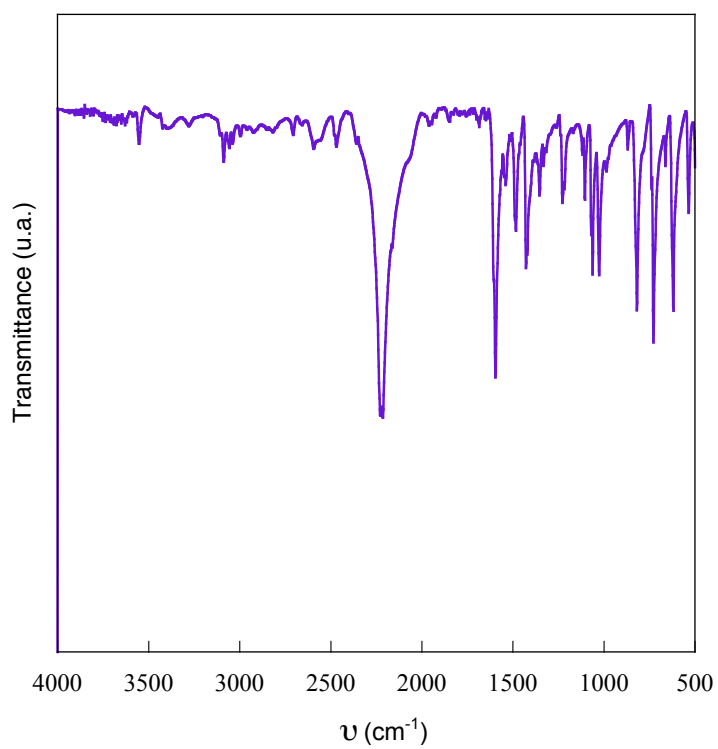

**Fig. S8.** IR spectra of  $[\text{Zn}(\text{NCO})_2(\text{DPS})] \text{ (3)}$   
 $[\text{Zn}(\text{bps})_4(\text{H}_2\text{O})_2](\text{ClO}_4)_2 \cdot \text{H}_2\text{O} \text{ (4)}$

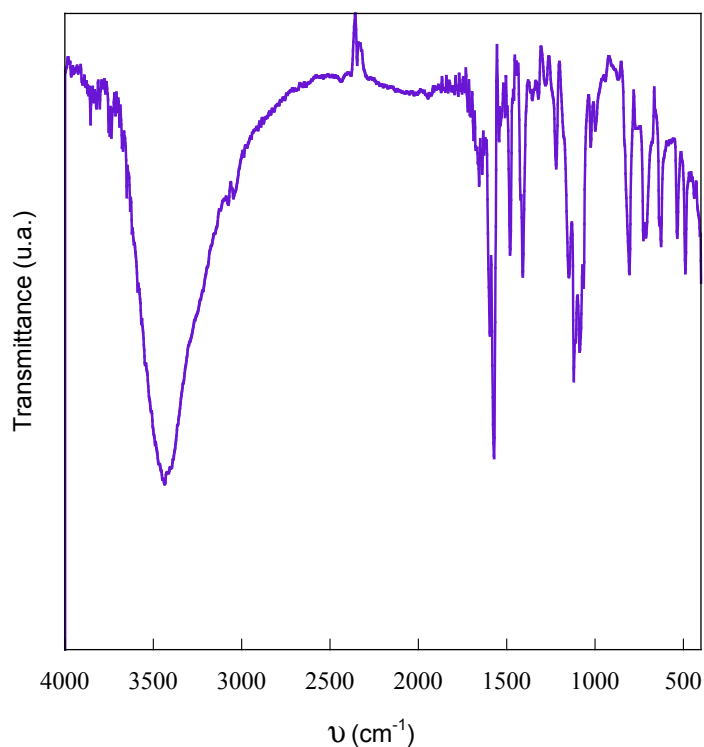

**Fig. S9.** IR spectra of  $[\text{Zn}(\text{DPS})_4(\text{H}_2\text{O})_2](\text{ClO}_4)_2 \cdot \text{H}_2\text{O} \text{ (4)}$

**Table S11.** Interpretation of IR bands in compounds 1-4. Bands corresponding to DPS are also included for reference.

| DPS      | (1)       | (2)       | (3)       | (4)       | assignment                                      |
|----------|-----------|-----------|-----------|-----------|-------------------------------------------------|
|          |           | 3450      |           | 3500      | $\nu(\text{O-H})_{\text{H}_2\text{O}}$          |
| 3000     | 2980      | 3000      | 3000-3100 | 3020      | $\nu(\text{C-H})_{\text{DPS}}$                  |
|          | 2095      | 2064      | 2212      |           | $\nu_{\text{as}}(\text{C-N})_{\text{NCO/NCS}}$  |
| 1576     | 1579      | 1598      | 1598      | 1570      | $\nu(\text{C=C}), \nu(\text{C=N})_{\text{DPS}}$ |
| 1413     | 1481      | 1420      | 1429      | 1480      | $\nu(\text{ArC-C})_{\text{DPS}}$                |
|          | 1229      | 805       | 1229      |           | $\nu(\text{C-O/S})_{\text{NCO/NCS}}$            |
|          |           |           |           | 1093      | $\nu_{\text{as}}(\text{Cl-O})_{\text{ClO}_4}$   |
| 1067/991 | 1063/1005 | 1095/1058 | 1065/1029 | 1062/1070 | $\delta_{\text{ep}}(\text{ArC-H})_{\text{DPS}}$ |
| 700      | 694       | 712       | 732       | 740       | $\nu_{\text{fp}}(\text{ArC-S})_{\text{DPS}}$    |
|          | 626       | 690       | 620       |           | $\delta(\text{NCO})_{\text{NCO/NCS}}$           |
|          |           |           |           | 630       | $\nu_{\text{Fas}}(\text{Cl-O})_{\text{ClO}_4}$  |
